# Supplementary material for: miRNA-199a-5p functions as a tumor suppressor in prolactinomas
Source: publisher site journal article supplement (doi:10.1515/chem-2019-0036), 2019-01-01
Supplement: Supplementary file 1 [file chem-2019-0036_sm.pdf]

## Supplementary Information

Wang Jichao, Guo Jing, Wang Fei, Cao Lei, Liu Qian, Feng Jie, Wang Hongyun, Gao Hua, Zhang Yazhuo\*

# Supplement: miRNA-199a-5p functions as a tumor suppressor in prolactinomas

**Supplementary Table 1:** Relationship between DDR1 and SAT1 in prolactinomas cases and various clinical parameters.

| Category          |                      | DDR1     |           |         | SAT1      |           |         |
|-------------------|----------------------|----------|-----------|---------|-----------|-----------|---------|
|                   |                      | Low      | High      |         | Low       | High      |         |
| <b>Cases</b>      |                      | 13       | 29        |         | 15        | 17        |         |
| <b>Age</b>        | Range                | 14-62    | 18-58     | p>0.05  | 18-60     | 14-62     | p>0.05  |
|                   | Mean±SD              | 33.1±8.3 | 32.4±11.7 |         | 32.6±10.3 | 34.3±12.7 |         |
| <b>Sex</b>        | Males                | 2        | 13        | p=0.066 | 6         | 9         | p=0.107 |
|                   | Females              | 11       | 16        |         | 19        | 8         |         |
| <b>PRL</b>        | (ng/ml)              | 543±281  | 1041±354  | p<0.05  | 577±243   | 1182±395  | p<0.05  |
| <b>Tumor size</b> | <3.05cm <sup>3</sup> | 9        | 12        | p=0.095 | 16        | 5         | p=0.116 |
|                   | ≥3.05cm <sup>3</sup> | 4        | 17        |         | 9         | 12        |         |
| <b>Invasive</b>   | Yes                  | 3        | 18        | p=0.019 | 9         | 12        | p=0.028 |
|                   | No                   | 10       | 11        |         | 16        | 5         |         |
| <b>Recurrence</b> | Yes                  | 2        | 5         | p=0.881 | 3         | 4         | p=0.256 |
|                   | No                   | 11       | 24        |         | 22        | 13        |         |
